# Supplementary material for: Perovskite alkali metal samarium borohydrides: crystal structures and thermal decomposition
Source: Royal Society of Chemistry journal article supplement (doi:10.1039/c7dt02405c), 2017-01-01
Supplement: c7dt02405c1.pdf [file c7dt02405c1.pdf]

# **Perovskite Alkali Metal Samarium Borohydrides: Crystal Structures and Thermal Decomposition**

Kasper T. Møller,<sup>1</sup> Alexander S. Fogh,<sup>1</sup> Mathias Jørgensen,<sup>1</sup> Torben R. Jensen<sup>1\*</sup>

*<sup>1</sup>Interdisciplinary Nanoscience Center (iNANO) and Department of Chemistry, University of Aarhus, DK-8000 Aarhus, Denmark*

\*Corresponding Author

Torben R. Jensen, trj@chem.au.dk

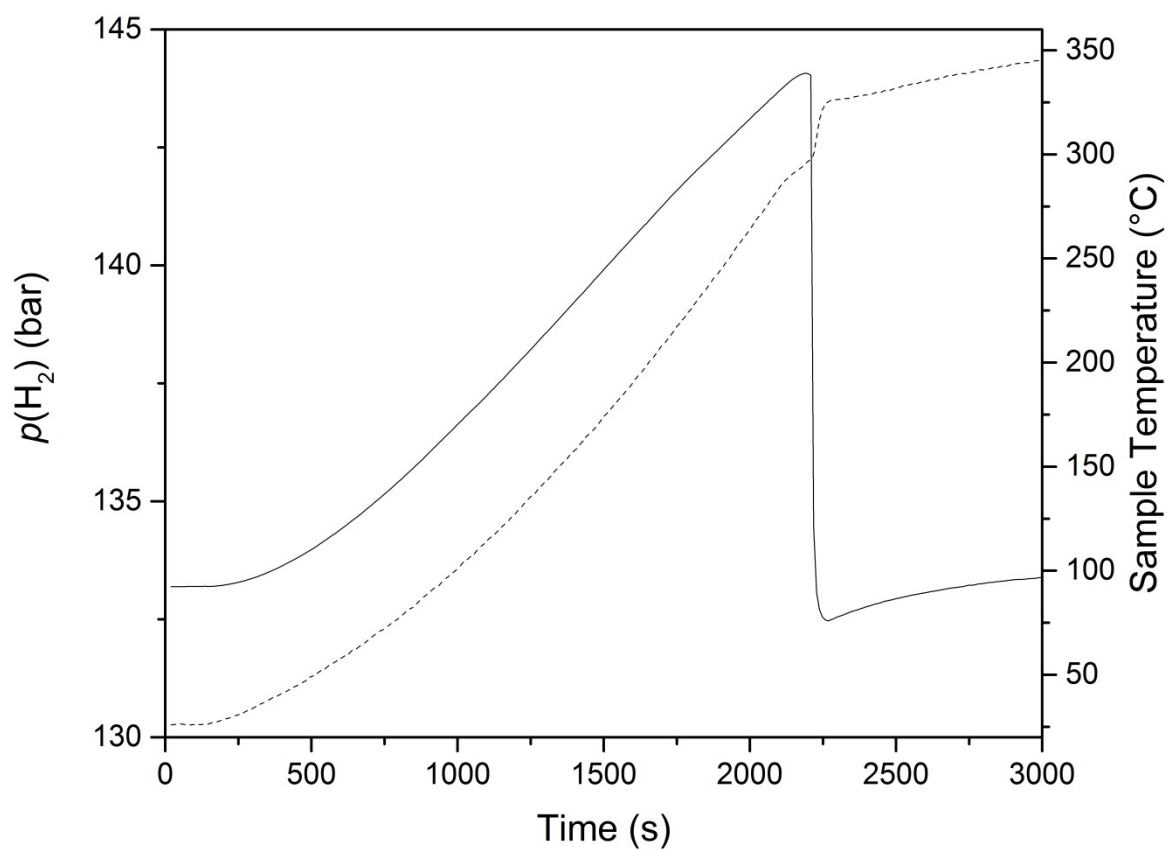

**Figure S1.** The hydrogen absorption of Sm metal to form  $\text{SmH}_2$ . The dashed line indicates the temperature while the solid line indicates the hydrogen pressure.

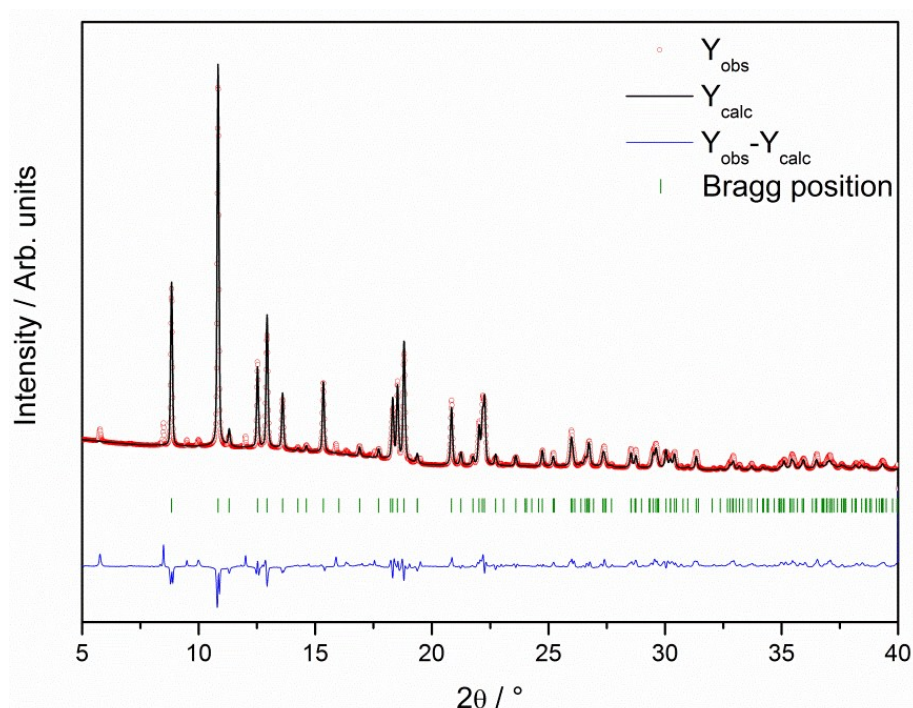

**Figure S2.** Rietveld refinement of the SR-PXD of  $\text{Sm}(\text{BH}_4)_2$  synthesized from  $\text{SmH}_2$  in  $\text{THF} \cdot \text{BH}_3$  ( $\lambda = 0.8212 \text{ \AA}$ ).  $\text{Sm}(\text{BH}_4)_2$ : green marker, observed data ( $Y_{\text{obs}}$ , red curve), Rietveld refinement profile ( $Y_{\text{calc}}$ , black curve), and difference plot ( $Y_{\text{obs}} - Y_{\text{calc}}$ , blue curve). Extracted unit cell parameters:  $a = 6.9349(3) \text{ \AA}$ ,  $b = 8.3339(4) \text{ \AA}$  and  $c = 7.5279(3) \text{ \AA}$ . Space-group:  $Pbcn$ .  $R_{\text{Bragg}} = 15.5\%$ .

Samarium(II) borohydride,  $\text{Sm}(\text{BH}_4)_2$ , is identified in the sample by SR-PXD. A structural model published elsewhere,<sup>1</sup> was applied for Rietveld refinement and is in accord with the observed data. However, a set of unidentified reflections are also observed, which may be associated with a solvate.

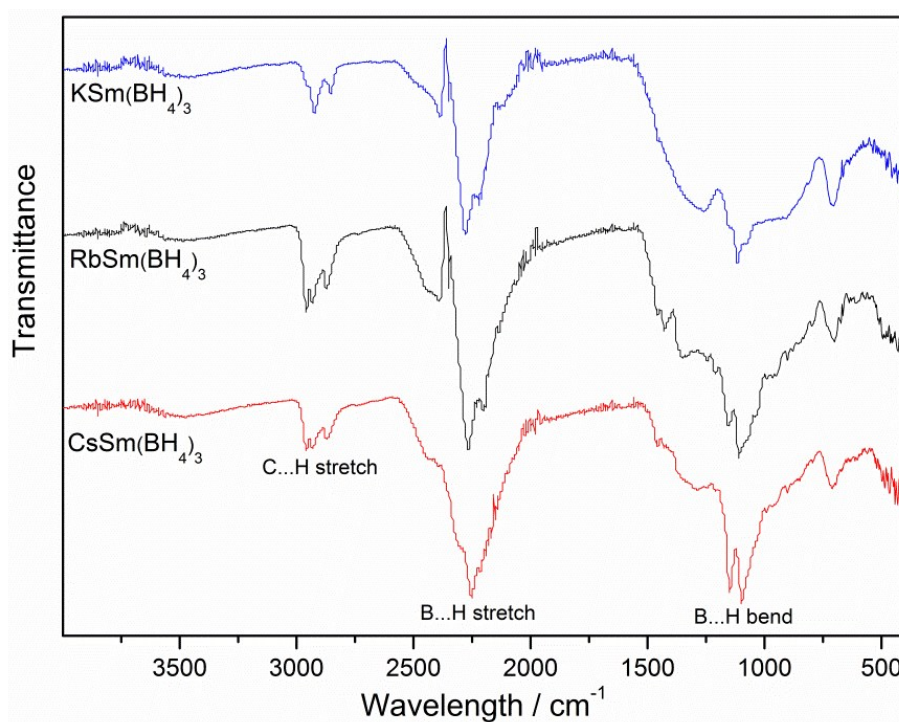

**Figure S3.** FT-IR on annealed samples of  $M\text{Sm}(\text{BH}_4)_3$ ,  $M = \text{K}, \text{Rb}, \text{Cs}$ .

FT-IR of the annealed  $M\text{Sm}(\text{BH}_4)_3$  samples indicates B–H bending and stretching modes at 2300–2200 and 1350–1100  $\text{cm}^{-1}$ , respectively. However, characteristic C–H stretches are also observed at 2960–2850  $\text{cm}^{-1}$ , possibly from remaining solvent.

## Volume per formula unit ( $V/Z$ ) Calculations

### **KSm(BH<sub>4</sub>)<sub>3</sub>:**

$$\sum V(\text{KBH}_4) + V(\text{Sm}(\text{BH}_4)_2) = 749.67 \text{ \AA}^3$$

$$V(\text{KSm}(\text{BH}_4)_3) = 744.26 \text{ \AA}^3$$

$$Z = 4$$

$$\Delta(V/Z) = (5.41/4) \text{ \AA}^3 = -1.35 \text{ \AA}^3$$

Hence,  $1.35 \text{ \AA}^3 / (749.67 \text{ \AA}^3 / 4) = 0.72 \%$  smaller.

### **RbSm(BH<sub>4</sub>)<sub>3</sub>:**

$$\sum V(\text{RbBH}_4) + V(\text{Sm}(\text{BH}_4)_2) = 792.51 \text{ \AA}^3$$

$$V(\text{RbSm}(\text{BH}_4)_3) = 782.3 \text{ \AA}^3$$

$$Z = 4$$

$$\Delta(V/Z) = (10.21/4) \text{ \AA}^3 = 2.55 \text{ \AA}^3$$

Hence,  $2.55 \text{ \AA}^3 / (792.51 \text{ \AA}^3 / 4) = 1.29 \%$  smaller.

### **CsSm(BH<sub>4</sub>)<sub>3</sub>:**

$$\sum V(\text{CsBH}_4) + V(\text{Sm}(\text{BH}_4)_2) = 853.58 \text{ \AA}^3$$

$$Z = 4$$

$$V/Z = 213.3395 \text{ \AA}^3$$

$$V(\text{CsSm}(\text{BH}_4)_3) = 406.35 \text{ \AA}^3$$

$$Z = 2$$

$$V/Z = 203.18 \text{ \AA}^3$$

$$\Delta(V/Z) = 10.215 \text{ \AA}^3$$

Hence,  $10.215 \text{ \AA}^3 / 213.3395 \text{ \AA}^3 = 4.79 \%$  smaller.

The small deviation of KSm(BH<sub>4</sub>)<sub>3</sub> is similar to KZn(BH<sub>4</sub>)Cl<sub>2</sub> ( $\Delta(V/Z) = 0.66 \%$ ),<sup>2</sup> which is also formed by ball-milling. Additionally, LiK(BH<sub>4</sub>)<sub>2</sub> has a  $\Delta(V/Z) = 5.53 \%$  and is also formed by ball-milling.<sup>3</sup> Hence, the thermal requirement for formation of RbSm(BH<sub>4</sub>)<sub>3</sub> and CsSm(BH<sub>4</sub>)<sub>3</sub> is unexpected, and usually only observed in compounds where  $\Delta(V/Z)$  deviates positively.<sup>4</sup>

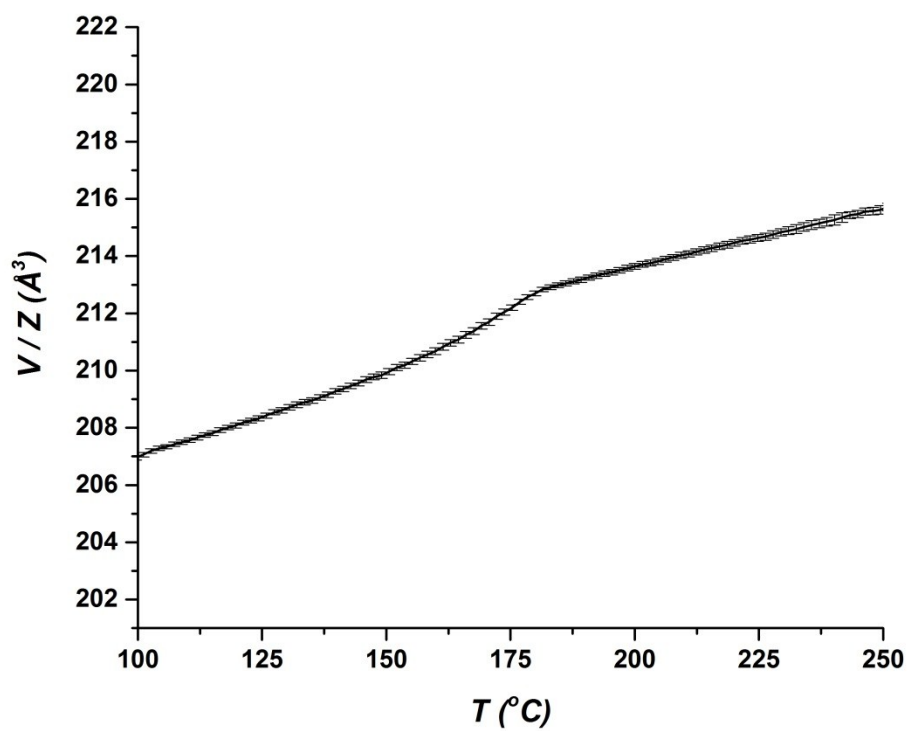

**Figure S4.** Increase in unit cell volume of  $\text{CsSm}(\text{BH}_4)_3$  as function of temperature.

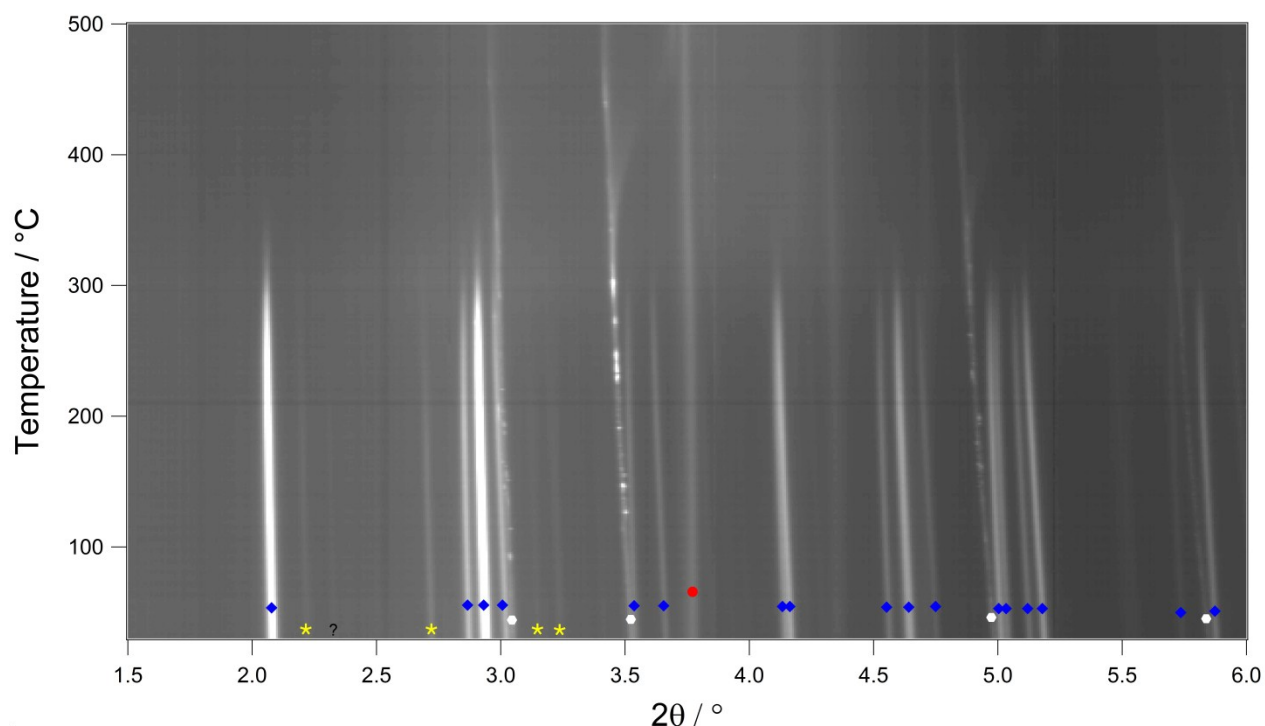

**Figure S5.** *In situ* SR-PXD data of the annealed  $\text{KSm}(\text{BH}_4)_3$  sample measured from  $RT$  to  $500\text{ }^\circ\text{C}$ ,  $\Delta T/\Delta t = 10\text{ }^\circ\text{C min}^{-1}$  at  $p(\text{Ar}) = 1\text{ bar}$  ( $\lambda = 0.2072\text{ \AA}$ ). Symbols:  $\text{Sm}(\text{BH}_4)_2$  (yellow star),  $\text{KSm}(\text{BH}_4)_3$  (blue diamond),  $\text{KBH}_4$  (white hexagon),  $\text{Sm}_2\text{O}_3$  (red circle), Unknown (black question mark).

Initially, the SR-PXD data show the reactants,  $\text{KBH}_4$  and  $\text{Sm}(\text{BH}_4)_2$ , the product,  $\text{KSm}(\text{BH}_4)_3$  and small fractions of  $\text{Sm}_2\text{O}_3$  and an unidentified impurity. Bragg reflections from  $\text{Sm}(\text{BH}_4)_2$  disappear at  $T \sim 330\text{ }^\circ\text{C}$  which is similar reported decomposition temperature.<sup>1</sup> Soon after,  $\text{KSm}(\text{BH}_4)_3$  decompose at  $T \sim 345\text{ }^\circ\text{C}$  which is very similar to the observation made in the *in situ* experiment for the as-milled  $\text{KBH}_4\text{--Sm}(\text{BH}_4)_2$  (1:1) sample.

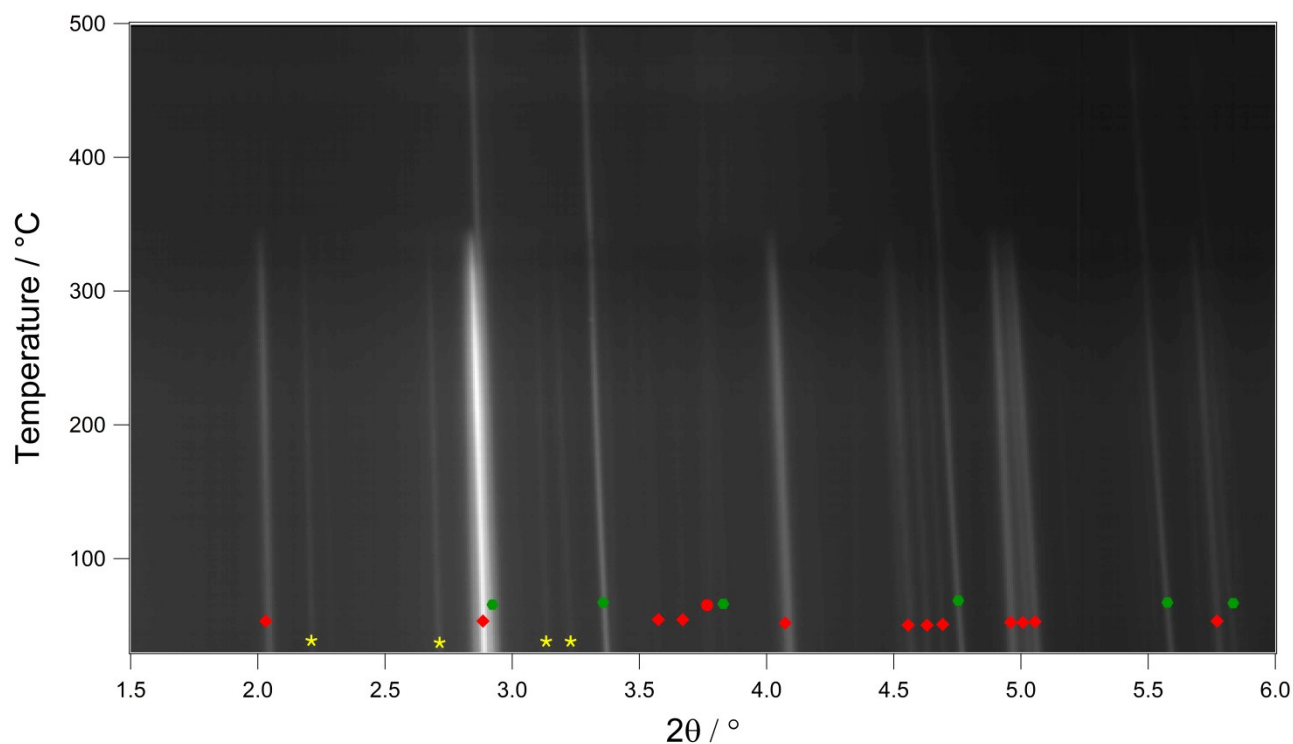

**Figure S6.** *In situ* SR-PXD data of the annealed  $\text{RbSm}(\text{BH}_4)_3$  sample measured from  $RT$  to  $500\text{ }^\circ\text{C}$  ( $\Delta T/\Delta t = 10\text{ }^\circ\text{C min}^{-1}$ ) at  $p(\text{Ar}) = 1\text{ bar}$  ( $\lambda = 0.2072\text{ \AA}$ ). Symbols:  $\text{Sm}(\text{BH}_4)_2$  (yellow star),  $\text{RbSm}(\text{BH}_4)_3$  (red diamond),  $\text{RbBH}_4$  (green hexagon),  $\text{Sm}_2\text{O}_3$  (red circle).

Initially, the SR-PXD data show the reactants,  $\text{RbBH}_4$  and  $\text{Sm}(\text{BH}_4)_2$ , the product,  $\text{RbSm}(\text{BH}_4)_3$  and a small fraction of  $\text{Sm}_2\text{O}_3$ . Bragg reflections from  $\text{Sm}(\text{BH}_4)_2$  and  $\text{KSm}(\text{BH}_4)_3$  disappear at  $T \sim 330\text{ }^\circ\text{C}$  and  $T \sim 345\text{ }^\circ\text{C}$ , respectively, which is very similar to the observations made in the *in situ* experiments for the as-milled  $\text{RbBH}_4\text{--Sm}(\text{BH}_4)_2$  (1:1) and the  $\text{KSm}(\text{BH}_4)_3$  sample.



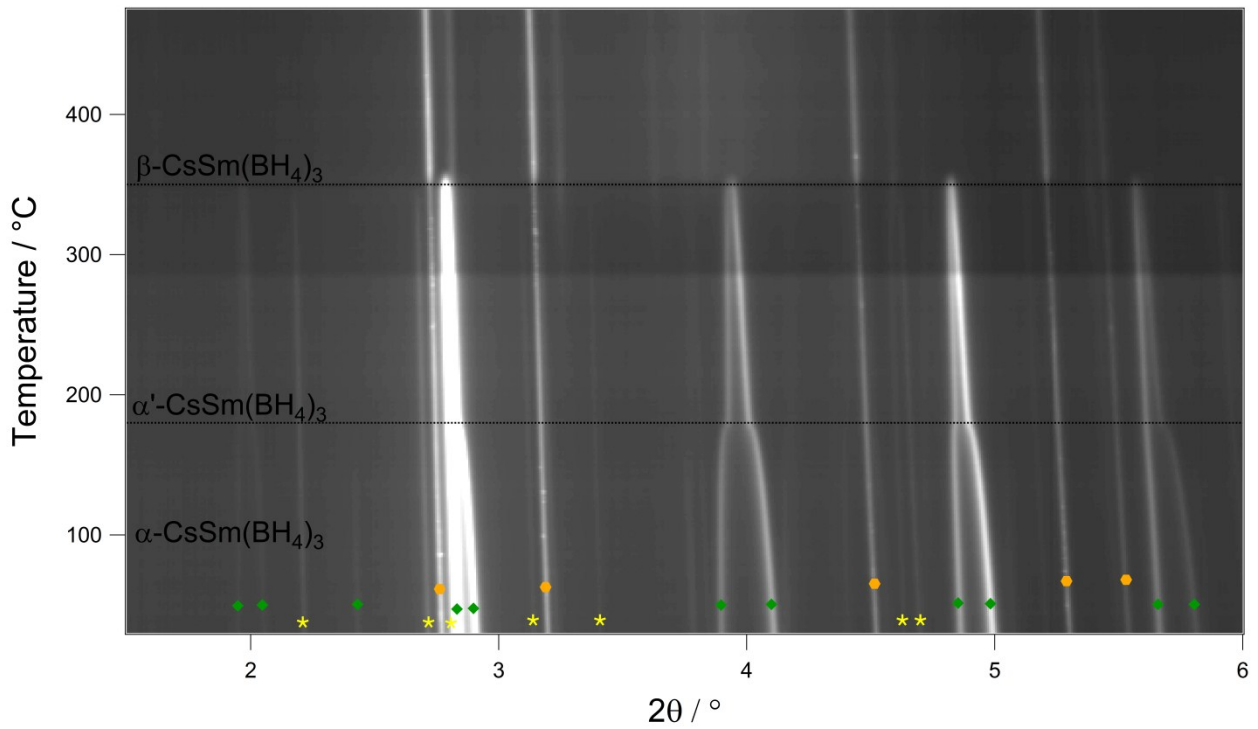

**Figure S7.** *In situ* SR-PXD data of the annealed  $\text{CsSm}(\text{BH}_4)_3$  sample measured from *RT* to 475 °C ( $\Delta T/\Delta t = 10 \text{ }^\circ\text{C min}^{-1}$ ) at  $p(\text{Ar}) = 1 \text{ bar}$  ( $\lambda = 0.2072 \text{ \AA}$ ). Symbols:  $\text{Sm}(\text{BH}_4)_2$  (yellow star),  $\text{CsSm}(\text{BH}_4)_3$  (green diamond),  $\text{CsBH}_4$  (orange hexagon).

Initially, the SR-PXD data show the reactants,  $\text{CsBH}_4$  and  $\text{Sm}(\text{BH}_4)_2$ , and the product,  $\text{CsSm}(\text{BH}_4)_3$ . In the temperature range *RT* to  $\sim 358 \text{ }^\circ\text{C}$ , Bragg reflections at  $2\theta \sim 2.9, 3.90, 4.11, 4.86, 4.99$  and  $5.82^\circ$  ( $d \sim 4.08, 3.05, 2.89, 2.44, 2.38$  and  $2.04 \text{ \AA}$ ) approaches existing reflections and eventually merge together in the second-order polymorphic transition. Bragg reflections from  $\text{Sm}(\text{BH}_4)_2$  and  $\text{KSm}(\text{BH}_4)_3$  disappear at  $T \sim 338 \text{ }^\circ\text{C}$  and  $T \sim 360 \text{ }^\circ\text{C}$ , respectively.

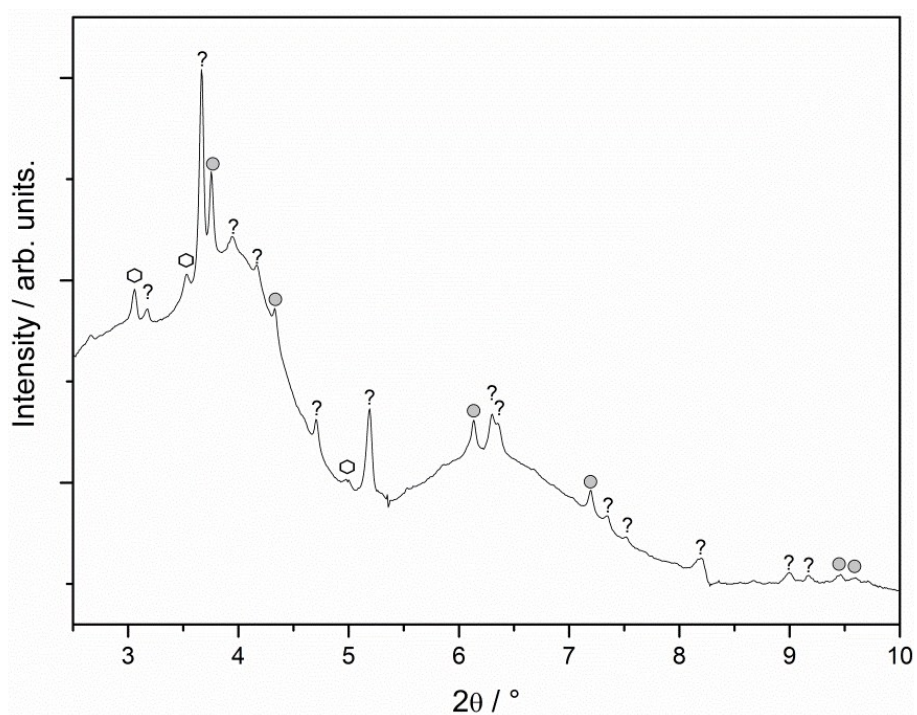

**Figure S8.** SR-PXD of the decomposition products of the  $\text{KSm}(\text{BH}_4)_3$  ( $\lambda = 0.2072 \text{ \AA}$ ) sample.

Symbols: white hexagon:  $\text{RbBH}_4$ ; grey circle:  $\text{SmH}_2$ ; black question mark: Unknown.

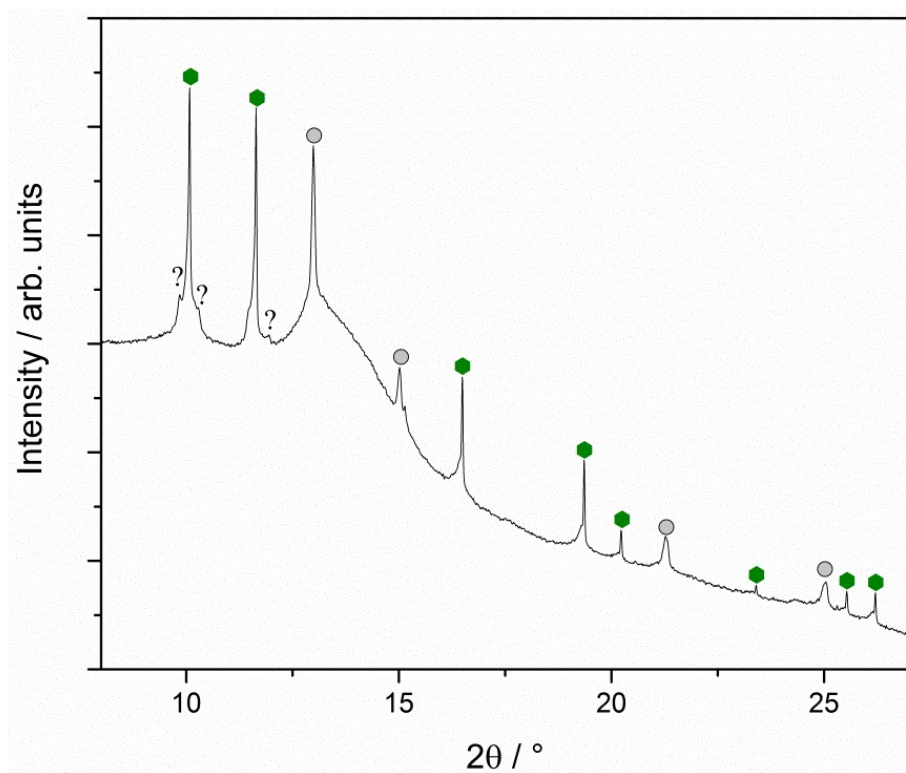

**Figure S9.** SR-PXD of the decomposition products of the  $\text{RbSm}(\text{BH}_4)_3$  (1:1,  $\lambda = 0.7129 \text{ \AA}$ ) sample.

Symbols: green hexagon:  $\text{RbBH}_4$ ; grey circle:  $\text{SmH}_2$ ; black question mark: Unknown.

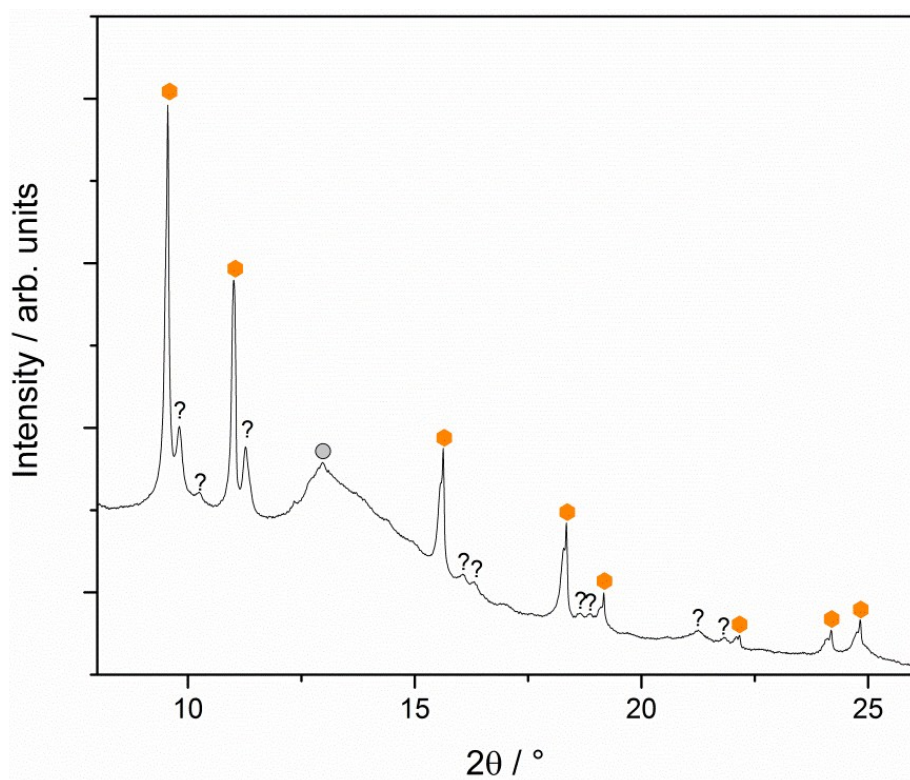

**Figure S10.** SR-PXD of the decomposition products of the  $\text{CsSm}(\text{BH}_4)_3$  ( $\lambda = 0.7129 \text{ \AA}$ ) sample.

Symbols: orange hexagon:  $\text{CsBH}_4$ ; grey circle:  $\text{SmH}_2$ ; black question mark: Unknown.

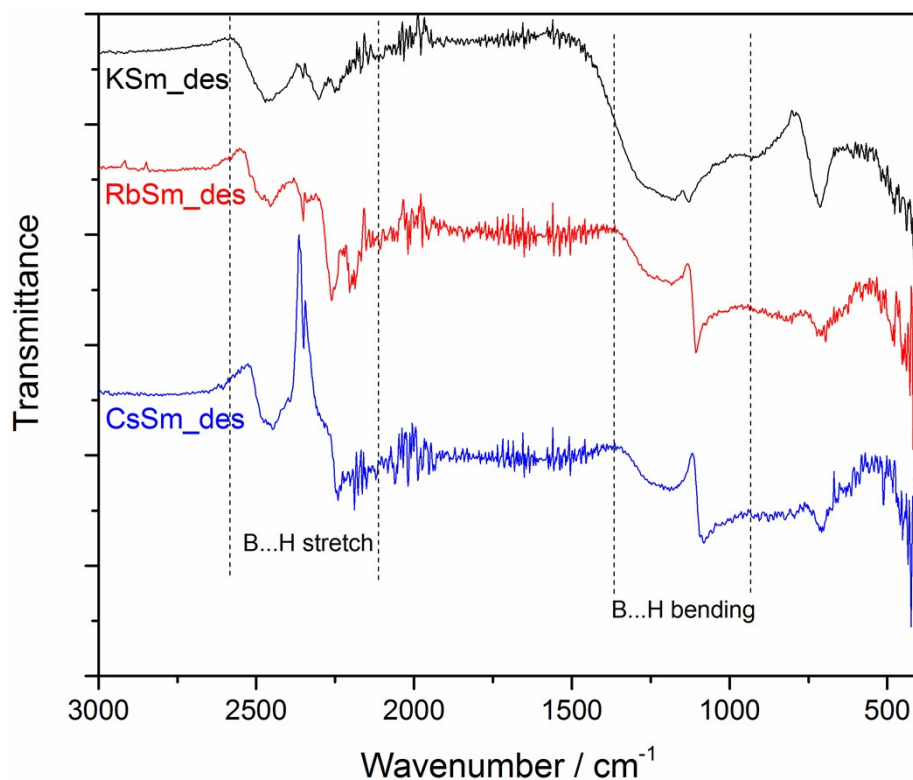

**Figure S11.** FT-IR on the desorbed samples of  $M\text{Sm}(\text{BH}_4)_3$ ,  $M = \text{K}, \text{Rb}, \text{Cs}$ .

FT-IR of the desorbed  $M\text{Sm}(\text{BH}_4)_3$  samples shows B–H bending modes at 2500-2450  $\text{cm}^{-1}$  which may indicate a higher borane species *e.g.*  $\text{SmB}_{12}\text{H}_{12}$ . Additional B–H bending and stretching modes are present at 2260-2180 and 1130-1080  $\text{cm}^{-1}$  which belong to the respective  $M\text{BH}_4$ .

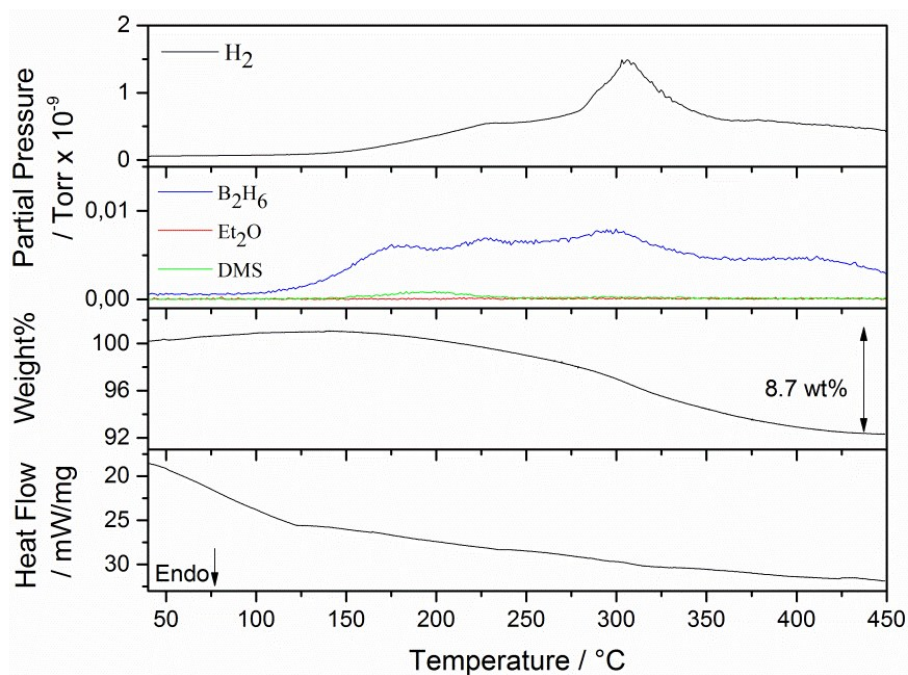

**Figure S12.** Differential scanning calorimetry (bottom), thermogravimetric analysis (second from bottom) and mass spectrometry (two top ones) data measured from  $RT$  to  $450\text{ }^{\circ}\text{C}$  of  $\text{KSm}(\text{BH}_4)_3$  ( $\Delta T/\Delta t = 3\text{ }^{\circ}\text{C min}^{-1}$ , Ar flow). Mass spectrometry (two top ones) shows hydrogen ( $m/z = 2$ ) and diborane,  $\text{B}_2\text{H}_6$  ( $m/z = 28$ ).

Thermal analysis of the  $\text{KSm}(\text{BH}_4)_3$ , Figure S11, shows an endothermic DSC event at  $T = 120\text{ }^{\circ}\text{C}$  which is associated with the initiating diborane release at  $T = 105\text{ }^{\circ}\text{C}$  observed in MS. The diborane release has three peak temperatures at  $T = 175$ ,  $225$  and  $300\text{ }^{\circ}\text{C}$ . A minor hydrogen release initiates at  $T = 130\text{ }^{\circ}\text{C}$  with peak temperature at  $T = 230$ . At  $T = 280\text{ }^{\circ}\text{C}$  a major hydrogen release initiates, which peaks at  $T = 306\text{ }^{\circ}\text{C}$ . Another endothermic event is observed at  $T = 315\text{ }^{\circ}\text{C}$ , which is slightly higher in temperature than the major release of hydrogen and the peak of diborane. The total weight release over the temperature range amounts to  $8.7\text{ wt\%}$ .



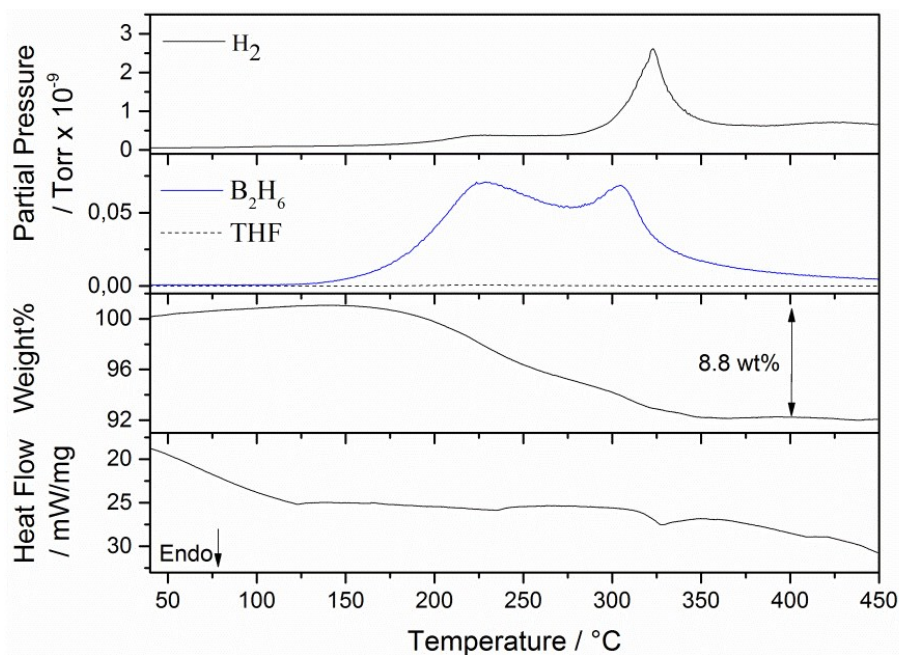

**Figure S13.** Differential scanning calorimetry (bottom), thermogravimetric analysis (second from bottom) and mass spectrometry (two top ones) data measured from  $RT$  to  $450\text{ }^{\circ}\text{C}$  of  $\text{CsSm}(\text{BH}_4)_3$  ( $\Delta T/\Delta t = 3\text{ }^{\circ}\text{C min}^{-1}$ , Ar flow). Mass spectrometry (two top ones) shows hydrogen ( $m/z = 2$ ) and diborane,  $\text{B}_2\text{H}_6$  ( $m/z = 28$ ).

Thermal analysis of the  $\text{CsSm}(\text{BH}_4)_3$ , Figure S12, shows an endothermic DSC event at  $T = 123\text{ }^{\circ}\text{C}$  which is associated with the initiating diborane release at  $T = 125\text{ }^{\circ}\text{C}$  observed in MS. A second endothermic event is observed at  $T = 235\text{ }^{\circ}\text{C}$ . This event is associated with a small peak in hydrogen release at  $T = 223\text{ }^{\circ}\text{C}$  and a major diborane release with peak temperature at  $T = 227\text{ }^{\circ}\text{C}$ . The diborane release has a second peak temperature at  $T = 305\text{ }^{\circ}\text{C}$  whilst a major hydrogen release initiates at  $T = 277\text{ }^{\circ}\text{C}$  and peaks at  $T = 323\text{ }^{\circ}\text{C}$ . Both gas releases are associated with a third endothermic event observed at  $T = 328\text{ }^{\circ}\text{C}$ . Finally, a fourth endothermic DSC event is observed at  $T = 410\text{ }^{\circ}\text{C}$ . The total weight release over the temperature range amounts to  $8.8\text{ wt}\%$ .

**Table S1.** Summary of DSC events, mass loss, and MS peak temperatures observed in the synthesised  $M\text{Sm}(\text{BH}_4)_3$  ( $M = \text{K}, \text{Rb}, \text{Cs}$ ) and in  $\text{Sm}(\text{BH}_4)_2$  for comparison.

| Compound                     | DSC [°C]                                             | TG [wt%] | MS( $\text{H}_2$ ) [°C] | MS( $\text{B}_2\text{H}_6$ ) [°C] | Ref        |
|------------------------------|------------------------------------------------------|----------|-------------------------|-----------------------------------|------------|
| $\text{KSm}(\text{BH}_4)_3$  | 120 (endo)<br>315 (endo)                             | 8.7      | 230, 306                | 175, 225, 300                     | This study |
| $\text{RbSm}(\text{BH}_4)_3$ | 122 (endo)<br>234 (endo)<br>325 (endo)<br>413 (endo) | 15.6     | (225), 315              | (205), 305                        | This study |
| $\text{CsSm}(\text{BH}_4)_3$ | 123 (endo)<br>235 (endo)<br>328 (endo)<br>410 (endo) | 8.8      | 223, 323                | 227, 305                          | This study |
| $\text{Sm}(\text{BH}_4)_2$   | 230 (endo)<br>313 (endo)                             | 26 wt%   | 180, 240, 325           | 180, 230, 310                     | [1]        |



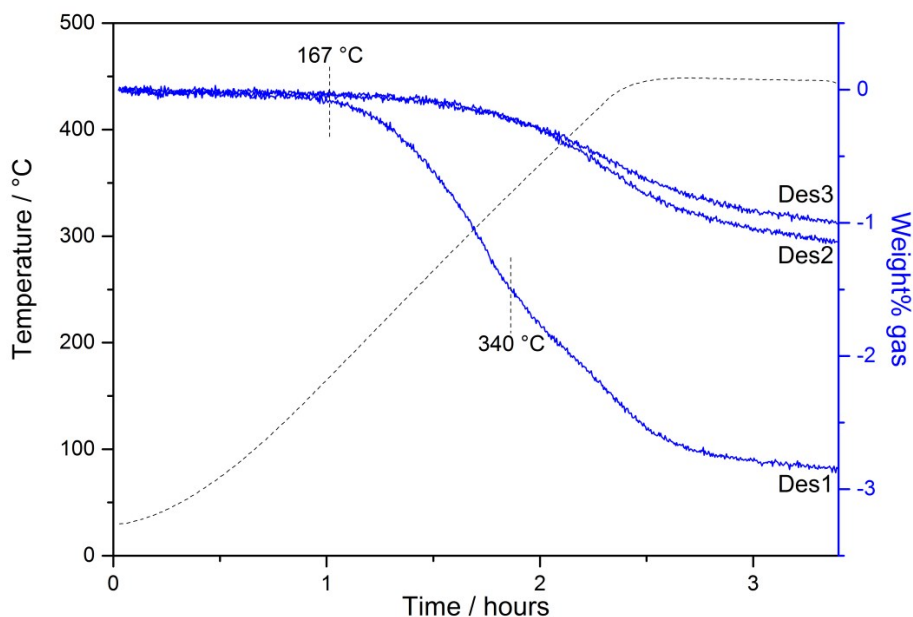

**Figure S14.** Sieverts measurement of  $\text{KSm}(\text{BH}_4)_3$  showing the three desorption curves conducted in the temperature range  $RT - 450\text{ °C}$  ( $\Delta T/\Delta t = 3\text{ °C/min}$ , fixed at  $450\text{ °C}$  for 1 hour and  $p(\text{H}_2) = 1\text{ bar}$ ).

The  $\text{KSm}(\text{BH}_4)_3$  sample shows a continuous gas release which is initiated at  $T \sim 167\text{ °C}$  and continues to  $T \sim 340\text{ °C}$ , see Figure S13. This fits well with the observation in the *in situ* SR-PXD data where  $\text{Sm}(\text{BH}_4)_2$  decrease in intensity and may gradually decompose in this temperature range. The amount of gas released is 1.51 wt%. At  $T \sim 340\text{ °C}$  the gas release rate changes which indicates a second decomposition step. The gas release continues as the temperature reaches  $450\text{ °C}$  and eventually amounts to 2.85 wt%  $\text{H}_2$  after a 1 hour isotherm at  $450\text{ °C}$ . This is slightly lower than the theoretically calculated hydrogen release from  $\text{KSm}(\text{BH}_4)_3$ . The second and third desorption curves initiate a gas release at approximately  $270 - 280\text{ °C}$  which continues throughout the measurement, ending in a total gas release of 1.1 and 1.0 wt%, respectively.

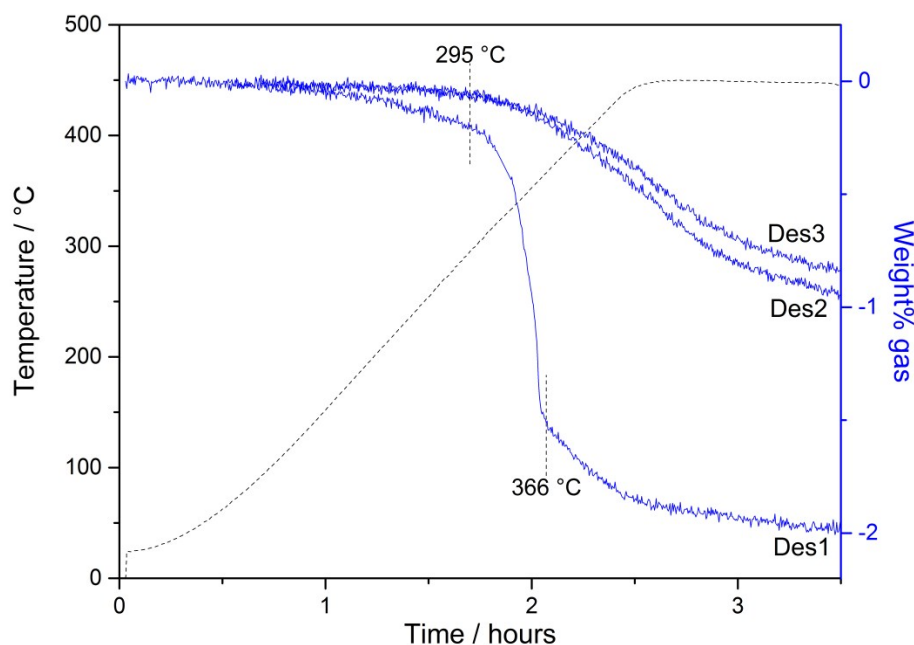

**Figure S15.** Sieverts measurement of  $\text{CsSm}(\text{BH}_4)_3$  showing the three desorption curves conducted in the temperature range  $\text{RT} - 450\text{ }^\circ\text{C}$  ( $\Delta T/\Delta t = 3\text{ }^\circ\text{C}/\text{min}$ , fixed at  $450\text{ }^\circ\text{C}$  for 1 hour and  $p(\text{H}_2) = 1$  bar).

The  $\text{CsSm}(\text{BH}_4)_3$  sample shows a continuous gas release of 0.2 wt% in the temperature range  $\text{RT}$  to  $295\text{ }^\circ\text{C}$ , see Figure S14. At  $T = 295\text{ }^\circ\text{C}$  a significant gas release initiates which continues up to  $366\text{ }^\circ\text{C}$  and amounts to 1.3 wt%. Another 0.5 wt% is released during a second significant gas release between  $T \sim 366$  to  $450\text{ }^\circ\text{C}$  which continues during the isothermal conditions. Hence, a total of 2.0 wt% gas is released from the sample, which is slightly more than theoretically possible.

The second and third desorption curve initiates at approximately  $T \sim 300\text{ }^\circ\text{C}$  releasing 0.94 and 0.84 wt%, respectively.

## References

- 1 T. D. Humphries, M. B. Ley, C. Frommen, K. Munroe, T. R. Jensen and B. C. Hauback, *J. Mater. Chem. A*, 2014, **3**, 691–698.
- 2 J. Huot, D. B. Ravnsbæk, J. Zhang, F. Cuevas, M. Latroche and T. R. Jensen, *Prog. Mater. Sci.*, 2013, **58**, 30–75.
- 3 M. B. Ley, E. Roedern and T. R. Jensen, *Phys Chem Chem Phys*, 2014, **16**, 24194–24199.
- 4 S. R. H. Jensen, L. H. Jepsen, J. Skibsted and T. R. Jensen, *J. Phys. Chem. C*, 2015, **119**, 27919–27929.
